# Supplementary material for: Determinants of Follow-Up Participation in the Internet-Based European Influenza Surveillance Platform Influenzanet
Source: J Med Internet Res. 2014 Mar 10;16(3):e78. doi: 10.2196/jmir.3010 (PMC3967126; doi:10.2196/jmir.3010)
Supplement: Supplementary file 2 [file jmir_v16i3e78_app2.pdf]

**Table 4:** Factors associated with the participation in the single country Influenzanet cohorts. Participation rate, crude and adjusted odds ratios and confidence intervals are shown for different strata.

| <b>Sweden</b><br>(www.influensakoll.se)                   |                                    |                                                   |                   |                 |                      |                 |
|-----------------------------------------------------------|------------------------------------|---------------------------------------------------|-------------------|-----------------|----------------------|-----------------|
| <b>Variable (target population)</b>                       | <b>Respondent participants (%)</b> | <b>Participants not involved in follow-up (%)</b> | <b>OR (crude)</b> | <b>95% C.I.</b> | <b>OR (adjusted)</b> | <b>95% C.I.</b> |
| Gender (2097)                                             |                                    |                                                   |                   |                 |                      |                 |
| Male (30%)                                                | 256 (40)                           | 382 (60)                                          | 1.00              |                 | 1.00                 |                 |
| Female (70%)                                              | 648 (44)                           | 811 (56)                                          | 1.19              | 0.99-1.44       | 1.22                 | 0.99-1.51       |
| Age (2097)                                                |                                    |                                                   |                   |                 |                      |                 |
| 15 - 30 (14%)                                             | 95 (32)                            | 203 (68)                                          | 0.43              | 0.31-0.59       | 0.50                 | 0.35-0.71       |
| 31 - 40 (29%)                                             | 199 (33)                           | 400 (67)                                          | 0.46              | 0.35-0.59       | 0.63                 | 0.46-0.85       |
| 41 - 50 (26%)                                             | 234 (42)                           | 322 (58)                                          | 0.67              | 0.51-0.86       | 0.96                 | 0.70-1.30       |
| 51 - 60 (19%)                                             | 208 (52)                           | 191 (48)                                          | 1.00              |                 | 1.00                 |                 |
| 61 - 70 (12%)                                             | 168 (69)                           | 77 (31)                                           | 2.0               | 1.43-2.8        | 1.63                 | 1.10-2.41       |
| Smoking (2096)                                            |                                    |                                                   |                   |                 |                      |                 |
| No (89%)                                                  | 828 (44)                           | 1045 (56)                                         | 1.00              |                 | 1.00                 |                 |
| Yes (11%)                                                 | 75 (34)                            | 148 (66)                                          | 0.64              | 0.48-0.86       | 0.60                 | 0.42-0.84       |
| Education (1903)                                          |                                    |                                                   |                   |                 |                      |                 |
| No formal qualification (<1%)                             | 1 (100)                            | 0 (0)                                             | -                 | -               | -                    | -               |
| Secondary/high school education (22%)                     | 151 (36)                           | 271 (64)                                          | 0.66              | 0.53-0.82       | 0.72                 | 0.56-0.92       |
| Still in education (3%)                                   | 13 (27)                            | 35 (73)                                           | 0.44              | 0.23-0.84       | 0.86                 | 0.43-1.71       |
| University Degree (75%)                                   | 656 (46)                           | 776 (54)                                          | 1.00              |                 | 1.00                 |                 |
| Chronic condition/disease (2097)                          |                                    |                                                   |                   |                 |                      |                 |
| No (86%)                                                  | 781 (43)                           | 1033 (57)                                         | 1.00              |                 | 1.00                 |                 |
| Yes (12%)                                                 | 123 (43)                           | 160 (57)                                          | 1.02              | 0.79-1.31       | 0.77                 | 0.57-1.03       |
| Vaccination against seasonal influenza for 2011/12 (2094) |                                    |                                                   |                   |                 |                      |                 |
| Yes (12%)                                                 | 161 (67)                           | 81 (33)                                           | 1.00              |                 | 1.00                 |                 |
| No (88%)                                                  | 743 (40)                           | 1109 (60)                                         | 0.34              | 0.25-0.45       | 0.44                 | 0.31-0.61       |
| Household with children (2009)                            |                                    |                                                   |                   |                 |                      |                 |

|                                                           |                                    |                                                   |                   |                 |                      |                 |
|-----------------------------------------------------------|------------------------------------|---------------------------------------------------|-------------------|-----------------|----------------------|-----------------|
| No (47%)                                                  | 495 (53)                           | 442 (47)                                          | 1.00              |                 | 1.00                 |                 |
| Yes (53%)                                                 | 372 (35)                           | 700 (65)                                          | 0.47              | 0.39-0.56       | 0.58                 | 0.46-0.74       |
| <b>United Kingdom</b><br>(www.flusurvey.org.uk)           |                                    |                                                   |                   |                 |                      |                 |
| <b>Variable (target population)</b>                       | <b>Respondent participants (%)</b> | <b>Participants not involved in follow-up (%)</b> | <b>OR (crude)</b> | <b>95% C.I.</b> | <b>OR (adjusted)</b> | <b>95% C.I.</b> |
| Gender (2171)                                             |                                    |                                                   |                   |                 |                      |                 |
| Male (35%)                                                | 442 (59)                           | 307 (41)                                          | 1.00              |                 | 1.00                 |                 |
| Female (65%)                                              | 738 (52)                           | 684 (48)                                          | 0.87              | 0.7-1.09        | 0.75                 | 0.61-0.92       |
| Age (2171)                                                |                                    |                                                   |                   |                 |                      |                 |
| 15 - 30 (19%)                                             | 152 (37)                           | 256 (63)                                          | 0.36              | 0.27-0.47       | 0.33                 | 0.23-0.45       |
| 31 - 40 (25%)                                             | 271 (50)                           | 271 (50)                                          | 0.60              | 0.47-0.78       | 0.56                 | 0.42-0.74       |
| 41 - 50 (21%)                                             | 239 (52)                           | 217 (48)                                          | 0.67              | 0.51-0.87       | 0.69                 | 0.51-0.94       |
| 51 - 60 (20%)                                             | 279 (62)                           | 169 (38)                                          | 1.00              |                 | 1.00                 |                 |
| 61 - 70 (15%)                                             | 239 (75)                           | 78 (25)                                           | 1.86              | 1.35-2.55       | 1.58                 | 1.11-2.25       |
| Smoking (2164)                                            |                                    |                                                   |                   |                 |                      |                 |
| No (88%)                                                  | 1078 (57)                          | 824 (43)                                          | 1.00              |                 | 1.00                 |                 |
| Yes (12%)                                                 | 102 (39)                           | 160 (61)                                          | 0.49              | 0.37-0.63       | 0.63                 | 0.47-0.86       |
| Education (2157)                                          |                                    |                                                   |                   |                 |                      |                 |
| No formal qualification (1%)                              | 14 (45)                            | 17 (55)                                           | 0.58              | 0.28-1.18       | 0.40                 | 0.17-0.94       |
| Secondary/High school education (22%)                     | 209 (43)                           | 275 (57)                                          | 0.55              | 0.44-0.67       | 0.50                 | 0.39-0.64       |
| Still in education (1%)                                   | 2 (14)                             | 12 (86)                                           | 0.12              | 0.03-0.52       | 0.27                 | 0.05-1.34       |
| University Degree (75%)                                   | 950 (58)                           | 678 (42)                                          | 1.00              |                 | 1.00                 |                 |
| Chronic condition/disease (2171)                          |                                    |                                                   |                   |                 |                      |                 |
| No (83%)                                                  | 988 (55)                           | 817 (45)                                          | 1.00              |                 | 1.00                 |                 |
| Yes (17%)                                                 | 192 (52)                           | 174 (48)                                          | 0.91              | 0.73-1.14       | 0.63                 | 0.48-0.83       |
| Vaccination against seasonal influenza for 2011/12 (2153) |                                    |                                                   |                   |                 |                      |                 |
| Yes (34%)                                                 | 475 (64)                           | 264 (36)                                          | 1.00              |                 | 1.00                 |                 |
| No (66%)                                                  | 705 (50)                           | 709 (50)                                          | 0.55              | 0.46-0.66       | 0.60                 | 0.48-0.75       |
| Household with children (2069)                            |                                    |                                                   |                   |                 |                      |                 |
| No (69%)                                                  | 828 (58)                           | 599 (42)                                          | 1.00              |                 | 1.00                 |                 |
| Yes (31%)                                                 | 288 (45)                           | 354 (55)                                          | 0.58              | 0.48-0.71       | 0.57                 | 0.46-0.71       |

|                                                            |                                    |                                                   |                   |                 |                      |                 |
|------------------------------------------------------------|------------------------------------|---------------------------------------------------|-------------------|-----------------|----------------------|-----------------|
|                                                            |                                    |                                                   |                   |                 |                      |                 |
| <b>The Netherlands</b><br>(www.degrotegriepmeting.nl)      |                                    |                                                   |                   |                 |                      |                 |
| <b>Variable (target population)</b>                        | <b>Respondent participants (%)</b> | <b>Participants not involved in follow-up (%)</b> | <b>OR (crude)</b> | <b>95% C.I.</b> | <b>OR (adjusted)</b> | <b>95% C.I.</b> |
| Gender (12514)                                             |                                    |                                                   |                   |                 |                      |                 |
| Male (39%)                                                 | 3891 (80)                          | 994 (20)                                          | 1.00              |                 | 1.00                 |                 |
| Female (61%)                                               | 5788 (76)                          | 1841 (24)                                         | 0.8               | 0.74-0.88       | 0.95                 | 0.87-1.05       |
| Age (12514)                                                |                                    |                                                   |                   |                 |                      |                 |
| 15 - 30 (9%)                                               | 651 (56)                           | 509 (44)                                          | 0.24              | 0.21-0.28       | 0.24                 | 0.20-0.29       |
| 31 - 40 (17%)                                              | 1448 (67)                          | 707 (33)                                          | 0.38              | 0.34-0.44       | 0.42                 | 0.36-0.49       |
| 41 - 50 (25%)                                              | 2325 (75)                          | 777 (25)                                          | 0.56              | 0.5-0.63        | 0.64                 | 0.56-0.74       |
| 51 - 60 (28%)                                              | 3000 (84)                          | 564 (16)                                          | 1.00              |                 | 1.00                 |                 |
| 61 - 70 (20%)                                              | 2255 (89)                          | 278 (11)                                          | 1.52              | 1.31-1.78       | 1.36                 | 1.15-1.61       |
| Smoking (12493)                                            |                                    |                                                   |                   |                 |                      |                 |
| No (84%)                                                   | 8257 (79)                          | 2239 (21)                                         | 1.00              |                 | 1.00                 |                 |
| Yes (16%)                                                  | 1409 (71)                          | 588 (29)                                          | 0.65              | 0.58-0.72       | 0.67                 | 0.60-0.75       |
| Education (12277)                                          |                                    |                                                   |                   |                 |                      |                 |
| No formal qualification (1%)                               | 133 (72)                           | 51 (28)                                           | 0.69              | 0.5-0.96        | 0.56                 | 0.39-0.81       |
| Secondary/high school education (40%)                      | 3758 (76)                          | 1164 (24)                                         | 0.87              | 0.8-0.96        | 0.80                 | 0.73-0.89       |
| Still in education (1%)                                    | 38 (49)                            | 40 (51)                                           | 0.25              | 0.16-0.39       | 0.57                 | 0.35-0.92       |
| University Degree (58%)                                    | 5579 (79)                          | 1514 (21)                                         | 1.00              |                 | 1.00                 |                 |
| Chronic condition/disease (12514)                          |                                    |                                                   |                   |                 |                      |                 |
| No (77%)                                                   | 7407 (77)                          | 2226 (23)                                         | 1.00              |                 | 1.00                 |                 |
| Yes (23%)                                                  | 2272 (79)                          | 609 (21)                                          | 1.12              | 1.01-1.24       | 0.80                 | 0.71-0.91       |
| Vaccination against seasonal influenza for 2011/12 (12506) |                                    |                                                   |                   |                 |                      |                 |
| Yes (33%)                                                  | 3402 (83)                          | 687 (17)                                          | 1.00              |                 | 1.00                 |                 |
| No (67%)                                                   | 6273 (64)                          | 2144 (25)                                         | 0.59              | 0.54-0.65       | 0.81                 | 0.71-0.91       |
| Household with children (12146)                            |                                    |                                                   |                   |                 |                      |                 |
| No (64%)                                                   | 6296 (82)                          | 1420 (18)                                         | 1.00              |                 | 1.00                 |                 |
| Yes (36%)                                                  | 3101 (70)                          | 1329 (30)                                         | 0.52              | 0.48-0.57       | 0.68                 | 0.61-0.76       |
| <b>Belgium</b>                                             |                                    |                                                   |                   |                 |                      |                 |

| (www.degrotegriepmeting.be)                               |                                    |                                                   |                   |                 |                      |                 |
|-----------------------------------------------------------|------------------------------------|---------------------------------------------------|-------------------|-----------------|----------------------|-----------------|
| <b>Variable (target population)</b>                       | <b>Respondent participants (%)</b> | <b>Participants not involved in follow-up (%)</b> | <b>OR (crude)</b> | <b>95% C.I.</b> | <b>OR (adjusted)</b> | <b>95% C.I.</b> |
| Gender (3834)                                             |                                    |                                                   |                   |                 |                      |                 |
| Male (52%)                                                | 1626 (81)                          | 370 (19)                                          | 1.00              |                 | 1.00                 |                 |
| Female (48%)                                              | 1416 (77)                          | 422 (23)                                          | 0.76              | 0.65-0.89       | 0.92                 | 0.77-1.09       |
| Age (3834)                                                |                                    |                                                   |                   |                 |                      |                 |
| 15 - 30 (11%)                                             | 271 (65)                           | 146 (35)                                          | 0.36              | 0.28-0.47       | 0.37                 | 0.27-0.50       |
| 31 - 40 (14%)                                             | 382 (68)                           | 180 (32)                                          | 0.42              | 0.33-0.53       | 0.42                 | 0.32-0.56       |
| 41 - 50 (21%)                                             | 621 (78)                           | 175 (22)                                          | 0.7               | 0.55-0.88       | 0.74                 | 0.57-0.96       |
| 51 - 60 (29%)                                             | 928 (83)                           | 182 (16)                                          | 1.00              |                 | 1.00                 |                 |
| 61 - 70 (25%)                                             | 840 (89)                           | 109 (11)                                          | 1.51              | 1.17-1.95       | 1.39                 | 1.06-1.81       |
| Smoking (3831)                                            |                                    |                                                   |                   |                 |                      |                 |
| No (86%)                                                  | 2657 (80)                          | 648 (20)                                          | 1.00              |                 | 1.00                 |                 |
| Yes (14%)                                                 | 382 (73)                           | 144 (27)                                          | 0.65              | 0.52-0.8        | 0.61                 | 0.48-0.77       |
| Education (3688)                                          |                                    |                                                   |                   |                 |                      |                 |
| No formal qualification (6%)                              | 166 (82)                           | 37 (18)                                           | 1.19              | 0.82-1.73       | 0.90                 | 0.61-1.34       |
| Secondary/high school education (33%)                     | 970 (80)                           | 244 (20)                                          | 1.06              | 0.89-1.27       | 0.89                 | 0.74-1.08       |
| Still in education (1%)                                   | 39 (67)                            | 19 (33)                                           | 0.54              | 0.31-0.95       | 0.94                 | 0.51-1.73       |
| University Degree (60%)                                   | 1747 (79)                          | 466 (21)                                          | 1.00              |                 | 1.00                 |                 |
| Chronic condition/disease (3834)                          |                                    |                                                   |                   |                 |                      |                 |
| No (81%)                                                  | 2434 (79)                          | 657 (21)                                          | 1.00              |                 | 1.00                 |                 |
| Yes (19%)                                                 | 608 (82)                           | 135 (18)                                          | 1.22              | 0.99-1.49       | 0.85                 | 0.68-1.08       |
| Vaccination against seasonal influenza for 2011/12 (3829) |                                    |                                                   |                   |                 |                      |                 |
| Yes (40%)                                                 | 1249 (82)                          | 269 (18)                                          | 1.00              |                 | 1.00                 |                 |
| No (60%)                                                  | 1789 (77)                          | 522 (23)                                          | 0.74              | 0.63-0.87       | 0.90                 | 0.74-1.07       |
| Household with children (3715)                            |                                    |                                                   |                   |                 |                      |                 |
| No (66%)                                                  | 2031 (83)                          | 428 (17)                                          | 1.00              |                 | 1.00                 |                 |
| Yes (34%)                                                 | 918 (73)                           | 338 (27)                                          | 0.57              | 0.48-0.67       | 0.78                 | 0.64-0.96       |
| <b>France</b><br>(www.grippenet.fr)                       |                                    |                                                   |                   |                 |                      |                 |
| <b>Variable (target population)</b>                       | <b>Respondent participants (%)</b> | <b>Participants not involved in follow-up (%)</b> | <b>OR</b>         | <b>95% C.I.</b> | <b>OR</b>            | <b>95% C.I.</b> |

| <b>population)</b>                                              | <b>participants</b><br><b>(%)</b>  | <b>not involved</b><br><b>in</b><br><b>follow-up (%)</b> | <b>(crude)</b>        |                 | <b>(adjusted)</b>        |                 |
|-----------------------------------------------------------------|------------------------------------|----------------------------------------------------------|-----------------------|-----------------|--------------------------|-----------------|
| Gender (3540)                                                   |                                    |                                                          |                       |                 |                          |                 |
| Male (33.5%)                                                    | 699 (59)                           | 487 (41)                                                 | 1.00                  |                 | 1.00                     |                 |
| Female (66.5%)                                                  | 1528 (65)                          | 826 (35)                                                 | 1.29                  | 1.12-1.49       | 1.41                     | 1.18-1.68       |
| Age (3540)                                                      |                                    |                                                          |                       |                 |                          |                 |
| 15 - 30 (15%)                                                   | 221 (42)                           | 301 (58)                                                 | 0.29                  | 0.23-0.36       | 0.25                     | 0.18-0.34       |
| 31 - 40 (20%)                                                   | 361 (49)                           | 369 (51)                                                 | 0.38                  | 0.31-0.48       | 0.40                     | 0.31-0.53       |
| 41 - 50 (19%)                                                   | 422 (63)                           | 248 (37)                                                 | 0.67                  | 0.54-0.83       | 0.69                     | 0.53-0.90       |
| 51 - 60 (22%)                                                   | 557 (72)                           | 219 (28)                                                 | 1.00                  |                 | 1.00                     |                 |
| 61 - 70 (24%)                                                   | 666 (79)                           | 176 (21)                                                 | 1.49                  | 1.18-1.87       | 1.51                     | 1.15-1.97       |
| Smoking (3533)                                                  |                                    |                                                          |                       |                 |                          |                 |
| No (83%)                                                        | 1925 (66)                          | 1003 (34)                                                | 1.00                  |                 | 1.00                     |                 |
| Yes (17%)                                                       | 297 (49)                           | 308 (51)                                                 | 0.5                   | 0.42-0.6        | 0.59                     | 0.47-0.73       |
| Education (3453)                                                |                                    |                                                          |                       |                 |                          |                 |
| No formal qualification<br>(2%)                                 | 37 (66)                            | 19 (34)                                                  | 1.17                  | 0.67-2.04       | 0.99                     | 0.53-1.85       |
| Secondary/high school<br>education (32%)                        | 721 (65)                           | 392 (35)                                                 | 1.19                  | 1.02-1.39       | 0.85                     | 0.71-1.03       |
| Still in education (1%)                                         | 8 (38)                             | 13 (62)                                                  | 0.36                  | 0.15-0.89       | 1.2                      | 0.44-3.25       |
| University Degree (66%)                                         | 1412 (62)                          | 851 (38)                                                 | 1.00                  |                 | 1.00                     |                 |
| Chronic condition/disease<br>(3540)                             |                                    |                                                          |                       |                 |                          |                 |
| No (83%)                                                        | 1845 (63)                          | 1091 (37)                                                | 1.00                  |                 | 1.00                     |                 |
| Yes (17%)                                                       | 382 (63)                           | 222 (37)                                                 | 1.02                  | 0.85-1.22       | 0.77                     | 0.61-0.97       |
| Vaccination against<br>seasonal influenza for<br>2011/12 (3535) |                                    |                                                          |                       |                 |                          |                 |
| Yes (25%)                                                       | 633 (72)                           | 248 (28)                                                 | 1.00                  |                 | 1.00                     |                 |
| No (75%)                                                        | 1593 (60)                          | 1061 (40)                                                | 0.59                  | 0.5-0.69        | 0.75                     | 0.61-0.92       |
| Household with children<br>(2945)                               |                                    |                                                          |                       |                 |                          |                 |
| No (56%)                                                        | 1124 (68)                          | 528 (32)                                                 | 1.00                  |                 | 1.00                     |                 |
| Yes (44%)                                                       | 733 (57)                           | 560 (43)                                                 | 0.61                  | 0.52-0.71       | 0.87                     | 0.71-1.07       |
| <b>Italy</b><br>(www.influweb.it)                               |                                    |                                                          |                       |                 |                          |                 |
| <b>Variable (target<br/>population)</b>                         | <b>Respondent<br/>Participants</b> | <b>Participants<br/>not involved</b>                     | <b>OR<br/>(crude)</b> | <b>95% C.I.</b> | <b>OR<br/>(adjusted)</b> | <b>95% C.I.</b> |

|                                                                 | (%)                                        | in<br>follow-up (%)                                           |                       |                 | d)                       |                 |
|-----------------------------------------------------------------|--------------------------------------------|---------------------------------------------------------------|-----------------------|-----------------|--------------------------|-----------------|
| Gender (1354)                                                   |                                            |                                                               |                       |                 |                          |                 |
| Male (60%)                                                      | 402 (50)                                   | 404 (50)                                                      | 1.00                  |                 | 1.00                     |                 |
| Female (40%)                                                    | 255 (47)                                   | 293 (53)                                                      | 0.87                  | 0.7-1.09        | 0.98                     | 0.70-1.38       |
| Age (1354)                                                      |                                            |                                                               |                       |                 |                          |                 |
| 15 - 30 (14%)                                                   | 68 (35)                                    | 126 (65)                                                      | 0.37                  | 0.25-0.55       | 0.32                     | 0.17-0.60       |
| 31 - 40 (28%)                                                   | 164 (44)                                   | 209 (56)                                                      | 0.54                  | 0.39-0.74       | 0.56                     | 0.33-0.95       |
| 41 - 50 (28%)                                                   | 169 (44)                                   | 211 (56)                                                      | 0.55                  | 0.4-0.76        | 0.43                     | 0.26-0.73       |
| 51 - 60 (19%)                                                   | 154 (59)                                   | 106 (41)                                                      | 1.00                  |                 | 1.00                     |                 |
| 61 - 70 (11%)                                                   | 102 (69)                                   | 45 (31)                                                       | 1.56                  | 1.02-2.39       | 0.91                     | 0.44-1.86       |
| Smoking (1344)                                                  |                                            |                                                               |                       |                 |                          |                 |
| No (79%)                                                        | 537 (50)                                   | 530 (50)                                                      | 1.00                  |                 | 1.00                     |                 |
| Yes (21%)                                                       | 115 (42)                                   | 162 (58)                                                      | 0.70                  | 0.54-0.91       | 0.57                     | 0.38-0.87       |
| Education (693)                                                 |                                            |                                                               |                       |                 |                          |                 |
| No formal qualification<br>(0%)                                 | 0                                          | 0                                                             | -                     | -               | -                        | -               |
| Secondary/high school<br>education (47%)                        | 137 (42)                                   | 192 (58)                                                      | 1.13                  | 0.83-1.54       | 1.24                     | 0.89-1.73       |
| Still in education (1%)                                         | 1 (33)                                     | 2 (66)                                                        | 0.79                  | 0.07-8.8        | 1.05                     | 0.09-12.13      |
| University Degree (52%)                                         | 136 (38)                                   | 225 (62)                                                      | 1.00                  |                 | 1.00                     |                 |
| Chronic condition/disease<br>(823)                              |                                            |                                                               |                       |                 |                          |                 |
| No (75%)                                                        | 239 (39)                                   | 381 (62)                                                      | 1.00                  |                 | 1.00                     |                 |
| Yes (25%)                                                       | 114 (56)                                   | 89 (44)                                                       | 2.04                  | 1.48-2.81       | 0.95                     | 0.59-1.55       |
| Vaccination against<br>seasonal influenza for<br>2011/12 (1354) |                                            |                                                               |                       |                 |                          |                 |
| Yes (15%)                                                       | 112 (56)                                   | 87 (44)                                                       | 1.00                  |                 | 1.00                     |                 |
| No (85%)                                                        | 545 (47)                                   | 610 (53)                                                      | 0.69                  | 0.51-0.94       | 0.86                     | 0.53-1.4        |
| Household with children<br>(1069)                               |                                            |                                                               |                       |                 |                          |                 |
| No (57%)                                                        | 282 (46)                                   | 329 (54)                                                      | 1.00                  |                 | 1.00                     |                 |
| Yes (43%)                                                       | 187 (41)                                   | 271 (59)                                                      | 0.80                  | 0.63-1.02       | 0.98                     | 0.68-1.38       |
| <b>Portugal</b><br>(www.gripenet.pt)                            |                                            |                                                               |                       |                 |                          |                 |
| <b>Variable (target<br/>population)</b>                         | <b>Respondent<br/>Participants<br/>(%)</b> | <b>Participants<br/>not involved<br/>in<br/>follow-up (%)</b> | <b>OR<br/>(crude)</b> | <b>95% C.I.</b> | <b>OR<br/>(adjusted)</b> | <b>95% C.I.</b> |
| Gender (1152)                                                   |                                            |                                                               |                       |                 |                          |                 |

|                                                                 |          |          |      |           |      |           |
|-----------------------------------------------------------------|----------|----------|------|-----------|------|-----------|
| Male (49%)                                                      | 390 (70) | 171 (30) | 1.00 |           | 1.00 |           |
| Female (51%)                                                    | 398 (67) | 193 (33) | 0.90 | 0.7-1.16  | 1.09 | 0.79-1.52 |
| Age (1152)                                                      |          |          |      |           |      |           |
| 15 - 30 (19%)                                                   | 113 (52) | 105 (48) | 0.36 | 0.24-0.53 | 0.41 | 0.24-0.71 |
| 31 - 40 (25%)                                                   | 190 (66) | 96 (34)  | 0.66 | 0.45-0.97 | 0.74 | 0.46-1.18 |
| 41 - 50 (26%)                                                   | 220 (72) | 84 (28)  | 0.87 | 0.59-1.29 | 1.07 | 0.66-1.73 |
| 51 - 60 (20%)                                                   | 174 (75) | 58 (25)  | 1.00 |           | 1.00 |           |
| 61 - 70 (10%)                                                   | 91 (81)  | 21 (19)  | 1.44 | 0.82-2.53 | 1.91 | 0.95-3.83 |
| Smoking (1149)                                                  |          |          |      |           |      |           |
| No (81%)                                                        | 666 (71) | 269 (29) | 1.00 |           | 1.00 |           |
| Yes (19%)                                                       | 121 (57) | 93 (43)  | 0.52 | 0.39-0.71 | 0.62 | 0.41-0.93 |
| Education (931)                                                 |          |          |      |           |      |           |
| No formal qualification<br>(1%)                                 | 1 (50)   | 1 (50)   | 0.40 | 0.02-6.5  | -    | -         |
| Secondary/high school<br>education (21%)                        | 124 (62) | 75 (38)  | 0.84 | 0.58-1.22 | 0.75 | 0.50-1.13 |
| Still in education (2%)                                         | 5 (29)   | 12 (71)  | 0.17 | 0.06-0.48 | 0.31 | 0.10-0.96 |
| University Degree (77%)                                         | 502 (70) | 211 (30) | 1.00 |           | 1.00 |           |
| Chronic condition/disease<br>(1152)                             |          |          |      |           |      |           |
| No (84%)                                                        | 655 (68) | 312 (32) | 1.00 |           | 1.00 |           |
| Yes (16%)                                                       | 133 (72) | 52 (28)  | 1.22 | 0.86-1.72 | 1.11 | 0.70-1.75 |
| Vaccination against<br>seasonal influenza for<br>2011/12 (1149) |          |          |      |           |      |           |
| Yes (21%)                                                       | 169 (71) | 70 (29)  | 1.00 |           | 1.00 |           |
| No (79%)                                                        | 618 (68) | 292 (32) | 0.88 | 0.64-1.2  | 1.20 | 0.80-1.81 |
| Household with children<br>(1067)                               |          |          |      |           |      |           |
| No (59%)                                                        | 453 (71) | 181 (29) | 1.00 |           | 1.00 |           |
| Yes (41%)                                                       | 277 (64) | 156 (36) | 0.70 | 0.54-0.92 | 0.61 | 0.43-0.87 |
